# Supplementary material for: Mood disorders in children following neonatal hypoxic-ischemic encephalopathy
Source: PubMed Central journal article supplement (PMC8797213; doi:10.1371/journal.pone.0263055), 2022-01-28
Supplement: pone.0263055.s001.pdf [file pone.0263055.s001.pdf]

| GROUP | GEST.AGE | NWB.WEIGHT | EDU.MAT | EDU.PAT | INCOME | <u>AGE@EXPL</u> |   |
|-------|----------|------------|---------|---------|--------|-----------------|---|
| CTL   | 39       | 3230       | 3       | 3       | 3      | 6               | 3 |
| CTL   | 37       | 3010       | 7       | 7       | 7      | 6               | 5 |
| CTL   | 40       | 3100       | 7       | 7       | 7      | 6               | 5 |
| CTL   | 40       | 3500       | 7       | 7       | 7      | 6               | 4 |
| CTL   | 39       | 3400       | 7       | 7       | 7      | 6               | 5 |
| CTL   | 42       | 4255       | 4       | 7       | 7      | 6               | 5 |
| CTL   | 38       | 2475       | 7       | 7       | 7      | 6               | 5 |
| CTL   | 40       | 3160       | 7       | 7       | 7      | 6               | 5 |
| CTL   | 41       | 4270       | 7       | 7       | 7      | 4               | 5 |
| CTL   | 40       | 3650       | 7       | 7       | 7      | 6               | 4 |
| CTL   | 35       | 2000       | 6       | 7       | 7      | 6               | 4 |
| CTL   | 35       | 1950       | 6       | 7       | 7      | 6               | 5 |
| CTL   | 39       | 3500       | 7       | 7       | 7      | 6               | 5 |
| CTL   | 40       | 3210       | 7       | 7       | 7      | 6               | 3 |
| CTL   | 38       | 3100       | 7       | 7       | 7      | 6               | 4 |
| NHIE  | 39       | 2790       | 7       | 7       | 7      | 6               | 5 |
| NHIE  | 38       | 3080       | 7       | 7       | 7      | 6               | 5 |
| NHIE  | 38       | 3000       | 7       | 7       | 7      | 6               | 5 |
| NHIE  | 40       | 2480       | 5       | 2       | 2      | 5               | 3 |
| NHIE  | 40       | 4000       | 7       | 7       | 7      | 6               | 4 |
| NHIE  | 39       | 3500       | 7       | 7       | 7      | 6               | 4 |
| NHIE  | 40       | 3500       | 7       | 7       | 7      | 4               | 3 |
| NHIE  | 37       | 2850       | 4       | 7       | 7      | 5               | 4 |
| NHIE  | 37       | 2950       | 7       | 7       | 7      | 6               | 4 |
| NHIE  | 39       | 3000       | 7       | 7       | 7      | 6               | 3 |
| NHIE  | 35       | 2900       | 7       | 7       | 7      | 5               | 5 |
| NHIE  | 38       | 4500       | 3       |         |        | 4               | 3 |
| NHIE  | 41       | 3380       | 6       | 3       | 3      |                 | 5 |
| NHIE  | 39       | 3100       | 6       | 6       | 6      | 6               | 5 |

weeks                      grams                      1 =NO                      1 =NO                      1 = Charity                      years  
 2 = 1st school                      2 = 1st school                      2 = unemployment assist  
 3 = 2nd school                      3 = 2nd school                      3 = 480 – 1000€/month  
 4 = professional                      4 = professional                      4 = 1000 – 1500€  
 5 = High school                      5 = High school                      5 = 1500 – 2000€  
 6 = Specialized p                      6 = Specialized p                      6 = >2000€  
 7 = University                      7 = University

| PRESS | GROUP  | ASQ3_Comun | ASQ3_MotGros: | ASQ3_MotFine | ASQ3_Resol | ASQ3_Soc |
|-------|--------|------------|---------------|--------------|------------|----------|
|       | 0 CTL  | 50         | 60            | 55           | 60         | 55       |
|       | 7 CTL  | 50         | 60            | 50           | 50         | 30       |
|       | 0 CTL  | 60         | 60            | 55           | 55         | 55       |
|       | 0 CTL  | 50         | 60            | 60           | 60         | 60       |
|       | 0 CTL  | 55         | 60            | 55           | 60         | 60       |
|       | 0 CTL  | 50         | 60            | 60           | 60         | 60       |
|       | 0 CTL  | 55         | 60            | 60           | 60         | 60       |
|       | 1 CTL  | 50         | 60            | 60           | 60         | 60       |
|       | 1 CTL  | 50         | 60            | 60           | 60         | 60       |
|       | 1 CTL  | 45         | 60            | 60           | 60         | 50       |
|       | 1 CTL  | 60         | 55            | 50           | 60         | 60       |
|       | 0 CTL  | 60         | 55            | 50           | 60         | 60       |
|       | 0 CTL  | 60         | 60            | 50           | 60         | 60       |
|       | 0 CTL  | 55         | 60            | 60           | 60         | 60       |
|       | 1 CTL  | 55         | 55            | 55           | 60         | 55       |
|       | 2 NHIE | 55         | 60            | 55           | 60         | 60       |
|       | 0 NHIE | 55         | 60            | 55           | 60         | 55       |
|       | 0 NHIE | 50         | 60            | 60           | 60         | 60       |
|       | 6 NHIE | 40         | 55            | 60           | 60         | 40       |
|       | 0 NHIE | 50         | 50            | 35           | 50         | 35       |
|       | 2 NHIE | 40         | 50            | 50           | 50         | 50       |
|       | 0 NHIE | 45         | 55            | 45           | 55         | 40       |
|       | 4 NHIE | 50         | 50            | 40           | 60         | 45       |
|       | 2 NHIE | 45         | 55            | 60           | 50         | 50       |
|       | 3 NHIE | 35         | 55            | 40           | 55         | 45       |
|       | 7 NHIE | 45         | 60            | 40           | 60         | 55       |
|       | 7 NHIE | 60         | 40            | 20           | 40         | 50       |
|       | 3 NHIE | 20         | 60            | 40           | 45         | 50       |
|       | 4 NHIE | 35         | 50            | 55           | 60         | 55       |

points

points

points

points

points

points
